# Supplementary material for: Genomic structural equation modelling provides insights into the multivariate genetic architecture of complex traits
Source: Springer Nature journal article supplement (doi:10.1038/s41562-019-0566-x), 2019-04-08
Supplement: MOESM3 [file 41562_2019_566_MOESM3_ESM-1.xlsx]

## Sheet: TableS1
Supplementary Table 1. Phenotypes used in Analyses
Phenotype	Sample Size
p-factor
Schizophrenia1	105318
Bipolar Disorder2	16731
Major Depressive Disorder (MDD)3	173005
Post-Traumatic Stress Disorder (PTSD)4	9537
Anxiety5	17310
Neuroticism
Mood Swings6	329428
Miserableness6	331856
Irritability6	322668
Sensitivity / hurt feelings6	327832			References
Fed-up feelings6	330549			1	Pardiñas, A. F. et al. Common schizophrenia alleles are enriched in mutation-intolerant genes and in regions under strong background selection. Nature Genetics 50, 381 (2018).
Nervous feelings6	328725			2	Sklar, P. et al. Large-scale genome-wide association analysis of bipolar disorder identifies a new susceptibility locus near ODZ4. Nature Genetics 43, 977 (2011).
Worrier / anxious feelings6	328717			3	Wray, N. R. & Sullivan, P. F. Genome-wide association analyses identify 44 risk variants and refine the genetic architecture of major depression. bioRxiv 167577 (2017).
Tense / 'highly strung'6	327232			4	Duncan, L. E. et al. Largest GWAS of PTSD (N= 20 070) yields genetic overlap with schizophrenia and sex differences in heritability. Molecular Psychiatry (2017).
Worry too long after embarrassment6	323766			5	Otowa, T. et al. Meta-analysis of genome-wide association studies of anxiety disorders. Molecular Psychiatry 21, 1391 (2016).
Suffer from ‘nerves’6	325248			6	Seed, C. et al. Hail: An Open-Source Framework for Scalable Genetic Data.
Loneliness, isolation6	332263			7	Shungin, D. et al. New genetic loci link adipose and insulin biology to body fat distribution. Nature 518, 187 (2015).
Guilty Feelings6	328769			8	Wood, A. R. et al. Defining the role of common variation in the genomic and biological architecture of adult human height. Nature Genetics 46, 1173 (2014).
Sum Score of 12 Neuroticism Items6	274008			9	Bradfield, J. P. et al. A genome-wide association meta-analysis identifies new childhood obesity loci. Nature Genetics 44, 526 (2012).
Anthropometric Traits				10	Taal, H. R. et al. Common variants at 12q15 and 12q24 are associated with infant head circumference. Nature Genetics 44, 532 (2012).
Body Mass Index (BMI)7	SNP specific (~200k – 300k)			11	van der Valk, R. J. et al. A novel common variant in DCST2 is associated with length in early life and height in adulthood. Hum Mol Genet 24, 1155–1168 (2014).
Waist-hip Ratio (WHR)7	SNP specific (~100k – 200k)			12	Horikoshi, M. et al. New loci associated with birth weight identify genetic links between intrauterine growth and adult height and metabolism. Nat Genet 45, 76-82 (2013).
Hip Circumference7	SNP specific (~100k – 200k)
Waist Circumference7	SNP specific (~100k – 200k)
Height8	SNP specific (~100k – 250k)
Childhood Obesity9	13848
Infant Head Circumference (IHC)10	SNP specific (~5k – 11k)
Birth Length11	SNP specific (~15k – 30k)
Birth Weight12	26836

## Sheet: TableS2
Supplementary Table 2. Factor loadings from EFA of the genetic covariance matrix of neuroticism items
	2-Factor Solution			3-Factor Solution				4-Factor Solution
Items	Factor 1	Factor 2		Factor 1	Factor 2	Factor 3		Factor 1	Factor 2	Factor 3	Factor 4
mood	0.91	0.06		0.91	-0.08	0.13		0.84	-0.05	0.11	0.14
misery	0.90	0.03		0.87	0.17	-0.07		0.88	0.16	-0.03	-0.05
irritability	0.71	0.10		0.70	0.04	0.09		0.43	0.16	-0.04	0.51
hurt	0.35	0.53		0.32	0.40	0.27		0.30	0.41	0.26	0.01
fed-up	0.98	-0.06		0.96	< .01	-0.04		0.98	-0.03	0.01	-0.04
nervous	-0.13	1.04		-0.11	0.05	0.99		-0.02	0.06	0.96	-0.06
worry	0.04	0.88		0.05	0.16	0.75		0.05	0.21	0.69	0.06
tense	0.23	0.68		0.26	-0.10	0.74		0.02	-0.01	0.63	0.51
embarrass	0.07	0.69		-0.01	0.89	0.11		-0.04	0.92	0.10	-0.03
nerves	0.13	0.81		0.15	-0.09	0.87		0.22	-0.10	0.87	-0.05
lonely	0.87	-0.08		0.85	-0.03	-0.03		0.83	-0.06	0.02	0.03
guilt	0.44	0.39		0.39	0.60	< .01		0.26	0.66	-0.04	0.17
Factor Correlations
Factor 1	-	-		-	-	-		-	-	-	-
Factor 2	0.62	-		0.42	-	-		0.51	-	-	-
Factor 3	N/A	N/A		0.57	0.62	-		0.52	0.67	-	-
Factor 4	N/A	N/A		N/A	N/A	N/A		0.50	0.22	0.37	-
Note. Exploratory factor analyses were run using an oblimin rotation within the fa function from the R psych package. All factor loadings are standardized. The 4-factor solution was not used to construct a follow-up CFA model, as the fourth factor was defined only by the irritability and tense items.

## Sheet: TableS3
Supplementary Table 3. QSNP estimates for one-, two-, and three-factor neuroticism models
			QSNP p-value				One-Factor Solution		Two-Factor Solution			Three-Factor Solution
CHR	SNP	BP	One-Factor Solution	Two-Factor Solution	Three-Factor Solution		p-value		Factor 1 p-value	Factor 2 p-value		Factor 1 p-value	Factor 2 p-value	Factor 3 p-value
1	rs55666439	44111212	7.97e-09	6.95585e-05	0.00337587		0.137616		0.194671	3.55887e-05		0.0844781	0.00693501	4.27214e-05
1	rs1845464	49796025	1.28e-08	0.0293091	0.000839964		0.50275		0.0276597	0.000414325		0.036062	0.388902	0.000126006
1	rs7526108	98305394	5.46e-10	1.76096e-05	0.0005848		0.13574		0.137784	3.06042e-05		0.0847924	0.17039	1.06942e-06
1	rs227199	210265384	1.17e-08	6.70265e-11	6.38106e-09		0.0123131		0.154051	0.00198943		0.359743	4.3025e-05	0.0504313
2	rs718139	23975911	7.05e-16	0.000381765	1.58739e-14		0.000104783		1.1619e-11	0.845909		2.57356e-09	0.00697895	0.815198
2	rs10460551	24627074	3.77e-08	0.0158427	1.14842e-05		0.000993173		2.25967e-08	0.965787		5.92252e-08	0.239365	0.923647
2	rs115319635	25441469	2.21e-08	0.000114483	0.0167517		0.448736		0.162769	0.00384278		0.249527	0.482926	4.22813e-05
2	rs4953150	45157336	2.93e-09	5.06957e-08	3.38771e-06		0.118325		0.000831048	0.448559		0.00045208	0.844859	0.324951
2	rs10490220	50945777	3.48e-08	9.29598e-07	7.68733e-05		0.000339499		9.86827e-08	0.422462		7.79031e-08	0.00949214	0.820813
2	rs1641155	58965211	3.64e-09	0.000109276	5.08528e-05		0.0707713		0.332419	1.35685e-05		0.277062	0.000223972	0.00150408
2	rs12994592	100857984	7.73e-10	2.59231e-10	0.000100506		0.930628		0.112435	0.0757246		0.00982834	0.0964374	0.0202586
2	rs4851649	104059441	9e-13	0.00121794	1.1607e-05		0.161803		0.0690101	8.71479e-06		0.154029	0.518049	7.60211e-07
2	rs13021256	162796517	8.16e-10	5.73367e-09	4.42537e-09		0.666125		0.0331629	0.214745		0.0192862	0.731488	0.0458475
2	rs12477961	199495674	4.29e-09	0.000185546	0.0525159		0.0320761		2.37852e-06	0.260022		6.68714e-08	0.126231	0.549136
3	rs35999162	49597230	8.22e-16	1.0557e-07	5.2248e-11		0.000280031		9.12274e-11	0.688588		1.06258e-10	0.32696	0.20227
3	rs353547	52268866	3.77e-10	2.68242e-08	0.00254226		0.0052085		0.494901	1.8139e-05		0.875011	0.137188	1.1001e-08
3	rs11719137	52876389	6.96e-12	0.000538572	0.376808		0.0389919		0.1606	1.69132e-07		0.0637921	0.0131662	5.62555e-09
3	rs34495106	85651136	3.73e-21	3.54103e-13	0.00100574		1.74338e-06		0.275602	1.38986e-13		0.246752	0.213591	2.85499e-21
3	rs9876664	85806313	4.82e-08	3.69826e-05	0.016393		0.790859		0.0353629	0.00533303		0.0242443	0.860756	0.000214186
4	rs362307	3241845	9.58e-09	3.07235e-08	1.10508e-06		0.706044		0.135519	0.0176547		0.045678	0.00271855	0.158115
4	rs34811474	25408838	2.39e-08	0.000896768	0.000414661		0.688835		0.00274852	0.0116796		0.00129419	0.0253828	0.108952
4	rs10027492	28647811	2.25e-12	0.000918852	0.000171974		0.318819		1.15588e-05	0.00467482		4.17821e-06	0.204816	0.0091953
4	rs10007721	105333354	1.54e-08	4.40676e-06	0.000246324		0.221422		0.004506	0.416214		0.0175431	0.0105165	0.0319963
4	rs12647922	106063987	2.5e-08	5.5721e-10	2.37382e-09		0.132642		0.185218	0.240921		0.367773	0.0409382	0.429512
4	rs2647234	106260991	1.51e-09	6.96837e-12	2.20667e-08		0.0287608		0.234003	0.0103634		0.421845	7.38233e-05	0.270967
4	rs13125131	130830801	1.19e-09	1.54988e-07	0.000101547		0.298815		0.272963	0.00179115		0.104916	0.0304943	0.00113468
5	rs747880	93982573	4.77e-10	0.000569291	8.39463e-06		0.0768887		0.252814	1.41766e-05		0.233126	0.00680602	0.000110395
5	rs7727738	112021399	4.84e-10	7.28715e-08	0.0822187		0.870478		0.0133117	0.00332857		0.000380197	0.00035108	0.0159612
5	rs67988891	152204741	2.9e-14	2.14447e-14	1.34061e-13		0.069834		0.00143476	0.757111		0.000940944	0.172999	0.331668
5	rs17503738	152603307	7.95e-09	6.11049e-09	7.14574e-10		0.678482		0.692062	0.25569		0.838895	0.269604	0.72593
6	rs3095335	30741305	1.5e-09	9.24742e-09	2.06369e-08		0.00104994		0.0251159	0.00070738		0.14009	0.0236975	1.21034e-05
6	rs2242660	31597753	7.13e-10	3.54662e-06	0.00399941		1.71919e-05		0.0302151	8.1707e-08		0.0861864	0.0180393	3.97619e-11
6	rs9490512	98537993	1.12e-08	1.32805e-10	4.06562e-05		0.815926		0.331282	0.567699		0.053269	0.000803203	0.462632
6	rs1906252	98550289	1.66e-14	7.08034e-14	6.34241e-13		0.000239357		0.000487852	0.00223468		2.33918e-05	0.490738	0.00109572
7	rs6465608	97356708	1.38e-09	0.00136631	0.131999		0.0507604		0.235309	1.71151e-06		0.102771	0.0106701	2.53449e-07
7	rs2396765	114304969	1.41e-09	1.06709e-13	3.19823e-12		0.000415867		0.000663378	0.0111286		0.000558836	0.0251276	0.0277171
8	rs1217106	64567670	5.91e-09	1.9099e-07	5.09757e-08		0.00111009		0.0106201	0.00123754		0.0848877	0.00221474	0.000251651
8	rs13256013	89463432	4.95e-08	1.23358e-08	1.85791e-05		0.0172642		0.00352936	0.288193		0.000832942	0.994302	0.182655
8	rs4129585	143312933	2.35e-09	0.0709597	0.00591922		3.79772e-06		0.128809	2.02535e-11		0.0849336	0.00320467	1.39443e-12
9	rs7852243	126417340	5.77e-11	1.53767e-06	6.24968e-05		0.0334367		0.967573	6.83706e-05		0.620069	0.84626	4.83192e-07
10	rs28606370	104670832	4.55e-15	6.55609e-06	1.08548e-05		0.0146889		0.39768	6.0665e-08		0.436013	0.0585266	2.75004e-09
10	rs11599236	106454672	9.16e-11	1.76796e-11	6.72545e-14		1.69702e-08		3.07342e-10	0.000307127		5.90514e-10	6.16526e-06	0.010403
11	rs34862781	13305263	5.15e-12	7.14585e-13	8.78232e-10		5.56253e-10		5.81477e-07	2.64601e-09		1.43679e-05	1.09042e-11	3.95495e-06
11	rs11030107	27694835	2.44e-13	6.59533e-06	8.56596e-08		0.0266664		0.348186	4.90141e-07		0.489325	0.136791	5.99741e-08
11	rs12364432	47902883	3.78e-13	9.97596e-14	8.67724e-17		6.26253e-10		6.74372e-10	5.23707e-06		3.44065e-09	0.00079258	4.26217e-07
11	rs893949	134296384	3.29e-08	0.00244831	0.377891		0.120518		1.28701e-05	0.0728764		1.52191e-06	0.413084	0.0643316
12	rs4298967	2408194	5.69e-10	1.21722e-08	3.66077e-08		0.00603889		0.611942	1.38386e-05		0.597631	0.167506	4.38066e-07
12	rs2160515	16753965	2.03e-13	1.84547e-08	4.55844e-06		0.550328		0.012464	0.000150977		0.00259761	0.00476493	0.000587714
12	rs933738	49943122	4.63e-08	3.32836e-10	1.27399e-07		0.0644309		0.568738	0.00492311		0.930989	0.00016232	0.0566292
12	rs651548	99560183	1.38e-08	1.44748e-09	1.47452e-07		0.0024178		0.186489	8.67154e-05		0.579367	0.000443058	7.35895e-05
12	rs3764002	108618630	2.14e-10	0.00109532	0.022545		0.023554		0.223138	8.8426e-08		0.131218	0.0161408	5.01199e-09
13	rs4885657	55677154	4.93e-09	2.78923e-06	5.42728e-05		0.103406		0.335865	9.79209e-05		0.158861	0.000357942	0.00209679
13	rs4886057	58595240	6.49e-09	3.26442e-06	0.000207798		0.0671739		0.000294774	0.612445		6.18674e-05	0.0423357	0.34385
14	rs35091253	29579558	4.23e-09	1.54745e-10	0.000477446		0.620067		0.35871	0.832236		0.110994	0.000816249	0.109249
14	rs12895055	99712794	2.84e-08	3.29595e-07	5.79432e-09		0.308259		0.83414	0.0209269		0.83289	0.132899	0.148864
16	rs62036613	28823097	2.43e-08	5.6948e-09	1.179e-08		0.017543		0.0150326	0.083503		0.00838953	0.923501	0.0133602
16	rs8054556	29958216	2.85e-12	0.000559125	0.00691791		0.328156		0.018844	2.67684e-05		0.032682	0.905709	7.59792e-08
16	rs61747555	71885423	1.81e-09	1.50241e-07	0.000404506		0.1988		0.000666109	0.168434		6.02462e-05	0.283024	0.15274
16	rs1805007	89986117	1.94e-09	7.5455e-08	6.18189e-08		0.380877		0.527618	0.0270741		0.488636	0.00635872	0.370295
17	rs507506	7118322	2.16e-08	1.09498e-05	1.98074e-05		0.169967		0.00296763	0.522544		0.00561372	0.131706	0.163496
17	rs11204421	19897805	4.25e-12	1.16715e-10	1.89005e-08		0.0018537		0.184003	3.31369e-05		0.0239021	0.341096	3.82161e-08
18	rs613872	53210302	1.46e-14	8.24117e-08	0.00442615		0.000428732		9.30937e-11	0.584875		1.30837e-12	0.164649	0.635093
18	rs663640	57846077	1.97e-11	1.52135e-06	0.000894904		6.88195e-06		0.132006	1.40991e-10		0.123958	0.0500608	2.01321e-14
19	rs111492783	19357612	1.14e-08	3.35447e-05	2.35787e-09		0.845224		0.0384168	0.0655707		0.183812	0.421008	0.059971
19	rs429358	45411941	3.22e-08	2.94588e-09	0.00109048		0.568925		0.50742	0.810218		0.577269	0.0154755	0.0100357
20	rs56238684	33236696	4.96e-08	6.01026e-06	1.59408e-06		0.000326214		0.0940769	3.08768e-06		0.0755748	0.0061875	7.50795e-06
20	rs6067019	47828526	1.44e-08	3.68737e-09	2.91107e-08		0.107202		0.191594	0.150835		0.117066	0.67346	0.0281308
21	rs2837381	41417215	1.28e-08	0.0193779	0.0852934		0.0327359		0.378061	1.28462e-06		0.195514	1.05493e-05	0.000188224
22	rs1974652	20134147	4.01e-08	2.27923e-10	7.61052e-07		0.00541232		0.000431655	0.189287		0.00263175	3.11473e-05	0.754953
Note. 69 independent QSNP hits for common factor of neuroticism were run through a one-, two-, and three-factor solution. For the two- and three-factor models, the SNP was specified to predict all higher-order factors simultaneously.

## Sheet: TableS4
Supplementary Table 4. Factor loadings from EFA of the genetic covariance matrix of anthroprometric items
Items	Factor 1	Factor 2
BMI	0.98	-0.10
WHR	0.90	-0.10
CO	0.75	-0.08
Waist	0.93	0.21
Hip	0.86	0.37
Height	-0.01	0.99
IHC	0.20	0.27
BL	0.07	0.51
BW	0.09	0.51
Factor Correlations
Factor 1	-	-
Factor 2	0.04	-
Note. Exploratory factor analyses were run using an oblimin rotation within the fa function from the R psych package. All factor loadings are standardized. Results presented are from a two-factor solution BMI = body mass index; WHR = waist-hip ratio; CO = childhood obesity; IHC = infant head circumference; BL = birth length; BW = birth weight.

## Sheet: TableS5
Supplementary Table 5. 128 independent hits for WLS estimation of the p-factor
CHR	SNP	BP	p-value	QSNP hit	Prev. Univariate GWAS	Prev. Outside Study
1	rs200451	6721234	4.16e-09	No	-
1	rs6694545	30437268	4.27e-12	No	SCZ
1	rs3001723	44037685	3.76e-08	No	SCZ
1	rs6662979	50581459	5e-08	No	-
1	rs10889993	73288601	7.78e-13	No	SCZ
1	rs1160682	73816564	2.44e-17	No	SCZ;MDD
1	rs2660304	98512127	6e-15	No	SCZ
1	rs11577346	150066530	1.55e-09	No	SCZ
1	rs12139672	190940627	1.6e-08	No	SCZ
1	rs11583546	200902607	4e-08	No	-
1	rs11587347	239198959	1.72e-09	No	SCZ
1	rs2953329	244025999	7.17e-10	No	SCZ
2	rs12712510	22749726	1.51e-09	No	-
2	rs12478766	28041200	4.53e-09	No	-
2	rs11682175	57987593	8.81e-12	No	SCZ					b
2	rs7557843	185498238	1.86e-08	No	-
2	rs2564383	198310862	6.29e-11	No	SCZ
2	rs1464209	198814396	1.97e-09	No	SCZ
2	rs7593422	200131695	5.67e-11	No	SCZ
2	rs11688415	201143409	1.85e-12	No	SCZ
2	rs3754798	201239957	1e-08	No	-
2	rs10197006	201314326	2.96e-08	No	SCZ
2	rs2464975	208497965	3.51e-08	No	-
2	rs6704768	233592501	2.32e-11	No	SCZ
3	rs9310707	2332104	2.36e-11	No	SCZ
3	rs17014863	2519703	5.3e-11	No	SCZ
3	rs9834970	36856030	9.19e-11	No	SCZ
3	rs7622851	52333671	9.83e-09	No	SCZ
3	rs4481150	52837793	2.38e-13	No	SCZ
3	rs2358740	53455569	1.39e-08	No	-	Goes et al. (2015; SCZ)1 ; Li et al. (2017; SCZ)2
3	rs832187	63833050	1.38e-09	No	SCZ
3	rs6780776	71554185	3.52e-08	No	SCZ*
3	rs7432375	136288405	1.36e-10	No	SCZ
3	rs13096210	180599318	5.64e-09	No	SCZ
3	rs1878874	181035370	2.85e-09	No	SCZ
4	rs13107325	103188709	1.78e-11	No	SCZ
4	rs12498839	176731401	3.26e-10	No	SCZ
4	rs6846161	176866459	4.74e-09	No	SCZ
5	rs7701440	60620980	1.25e-11	No	SCZ
5	rs16867576	88746331	9.09e-09	No	SCZ
5	rs6869862	103886213	5.57e-09	No	MDD
5	rs11956240	137840293	3.52e-08	No	SCZ
5	rs12153328	152247221	3.66e-09	No	SCZ
6	rs6900224	25437986	5.63e-09	No	SCZ
6	rs2893820	26295686	3.72e-09	No	SCZ
6	rs1011665	27332298	9.83e-11	No	SCZ
6	rs2232429	28359632	3.98e-38	No	SCZ;MDD
6	rs2531806	28417152	7.29e-15	No	SCZ
6	rs2596501	31321211	2.76e-10	No	SCZ
6	rs3828912	31465726	2.38e-10	No	-
6	rs615672	32574171	1.39e-08	No	SCZ
6	rs7383287	32783086	6.47e-09	No	SCZ
6	rs3130100	33283766	4.38e-08	No	-
6	rs210133	33536797	1.33e-10	No	SCZ
6	rs319920	64504252	2.67e-08	No	-
6	rs9360557	73132745	1.29e-10	No	SCZ
6	rs2224195	84307726	1.38e-10	No	SCZ
6	rs634940	93077500	9.62e-10	No	SCZ*
7	rs4721295	2036669	6.41e-13	Yes	SCZ
7	rs12665866	24787279	1.82e-09	No	-
7	rs2522831	82448100	1.43e-10	No	-	Aragam et al. (2011; MDD)3
7	rs13230421	86420126	9.25e-10	No	SCZ
7	rs2214087	104029449	9.98e-09	No	SCZ
7	rs10241415	104948076	2.3e-09	No	SCZ
7	rs211829	110048893	4.75e-10	No	SCZ
7	rs3735026	137074839	1.08e-08	No	SCZ
8	rs6558008	27438306	9.24e-09	No	SCZ
8	rs2609653	34236992	6.32e-09	No	-	PGS Cross-Disorder Group (2013)4 ; Jiang & Zhang (2011; BIP)5
8	rs12681196	38236594	3.07e-08	No	SCZ
8	rs17215671	64646646	1.29e-08	No	-
8	rs4129585	143312933	4.88e-16	No	SCZ
8	rs6983847	143357960	7.59e-09	No	SCZ*
9	rs12337437	28679944	1.38e-10	No	SCZ
9	rs4552973	96301719	4.18e-08	No	-
9	rs7867465	101069078	2.35e-08	No	SCZ
10	rs10794891	2312291	1.2e-11	No	SCZ
10	rs7099380	18549016	1.34e-08	No	SCZ*
10	rs7893279	18745105	4.97e-13	No	SCZ
10	rs17114808	104391285	4.78e-11	No	SCZ
10	rs11191582	104913653	1.74e-19	No	SCZ
10	rs1163238	104943993	1.61e-08	No	SCZ
10	rs7900775	106600343	3.12e-08	No	-
11	rs7951579	46469900	8.56e-09	No	SCZ
11	rs12798206	57668479	9.21e-11	No	SCZ
11	rs2514218	113392994	4.26e-13	No	SCZ
11	rs1939214	124605290	1.16e-08	No	SCZ
11	rs3802901	124635144	4.68e-09	No	SCZ
11	rs1433980	130870956	2.56e-08	No	SCZ
11	rs11825938	131394872	2.72e-08	No	-
11	rs11223651	133841034	1.53e-10	No	SCZ
12	rs2159100	2346393	2.18e-17	No	SCZ
12	rs740417	2499849	1.17e-09	No	SCZ
12	rs10783624	39522907	4.9e-08	No	SCZ
12	rs324015	57490100	4.61e-08	No	SCZ
12	rs2372642	99480548	3.9e-08	No	-
12	rs10849900	110974890	3.86e-08	No	SCZ
12	rs2851447	123665113	9.79e-10	No	SCZ
13	rs9595066	44706268	5.55e-09	No	-	Goes et al. (2015; SCZ)1
14	rs1191551	30000405	7.84e-09	No	SCZ
14	rs2190864	72416219	6.76e-09	No	SCZ
14	rs3850422	99671788	3.9e-08	No	-
14	rs1405238	99733954	3.47e-09	No	-
14	rs2403197	104053764	6.47e-14	No	SCZ
15	rs11638972	44074691	4.7e-08	No	-
15	rs11854184	49293194	1.24e-08	No	-
15	rs2414718	61863133	3.13e-08	No	SCZ
15	rs1355585	70586617	9.3e-09	No	-
15	rs3743078	78894759	1.76e-08	No	SCZ
15	rs783540	83254708	1.8e-08	No	SCZ
15	rs1051168	85200520	6.3e-10	No	SCZ
15	rs17514846	91416550	3.88e-13	No	SCZ
16	rs9930307	9899226	4.83e-10	No	SCZ
16	rs7499750	13749265	3.44e-10	No	SCZ
16	rs3814883	29994922	2.11e-12	No	SCZ
16	rs42945	58545426	2.07e-08	No	SCZ
18	rs4632195	50746748	5.22e-10	No	-	Goes et al. (2015; SCZ)1; Li et al. (2017; SCZ)2; Okbay et al. (2016; Neuroticism)6
18	rs11874716	52750688	6.49e-14	No	SCZ
18	rs9960767	53155002	3.1e-09	No	SCZ			References
18	rs587136	53225049	2.24e-10	No	SCZ			1	Goes, F. S. et al. Genome‐wide association study of schizophrenia in Ashkenazi Jews. American Journal of Medical Genetics Part B: Neuropsychiatric Genetics 168, 649–659 (2015).
18	rs12458596	53410912	2.44e-09	No	SCZ			2	Li, Z. et al. Genome-wide association analysis identifies 30 new susceptibility loci for schizophrenia. Nature Genetics 49, 1576 (2017).
18	rs7238071	77579812	2.38e-08	No	SCZ			3	Aragam, N., Wang, K.-S. & Pan, Y. Genome-wide association analysis of gender differences in major depressive disorder in the Netherlands NESDA and NTR population-based samples. Journal of affective disorders 133, 516–521 (2011).
19	rs7245983	19657632	2.98e-08	No	SCZ			4	Consortium, C.-D. G. O. T. P. G. Identification of risk loci with shared effects on five major psychiatric disorders: a genome-wide analysis. The Lancet 381, 1371–1379 (2013).
19	rs4280366	29225795	1.26e-10	No	SCZ			5	Jiang, Y. & Zhang, H. Propensity score‐based nonparametric test revealing genetic variants underlying bipolar disorder. Genetic epidemiology 35, 125–132 (2011).
20	rs6065094	37453194	2.67e-12	No	SCZ			6	Okbay, A. et al. Genetic variants associated with subjective well-being, depressive symptoms, and neuroticism identified through genome-wide analyses. Nature Genetics 48, 624 (2016).
21	rs2256853	31178626	5.08e-10	No	SCZ
22	rs2010746	40041317	1.43e-11	No	SCZ
22	rs4821998	41468273	8.07e-09	No	SCZ
22	rs134873	42657566	5.71e-11	No	SCZ
Note. 128 independent hits for the p-factor defined using a pruning window of 500 kb and r2 > 0.1. For chromosomes 6 and 8 an additional pruning filter was used of 1,000,000 kb and r2 > 0.1 to account for long-range LD due to the MHC region and pericentric inversion, respectively. The “Prev. Univariate GWAS” column indicates whether the hit was in LD with a hit for one of the univariate indicator…

## Sheet: TableS6
Supplementary Table 6. 118 independent hits for WLS estimation of neuroticism
CHR	SNP	BP	p-value	QSNP hit	Prev. Univariate GWAS	Prev. Outside Study
1	rs2102341	37193908	9.87e-11	No	Guilt
1	rs138471212	75725017	1.19e-08	No	-
1	rs2206544	171842607	1.57e-08	No	-
1	rs7536102	174465939	3.88e-08	No	Tense
1	rs169235	181740924	2.37e-08	No	Worry
2	rs4396680	10178236	4.58e-08	No	Worry
2	rs2678897	58169418	7.82e-09	No	Misery; Irr
2	rs2019198	58726873	2.36e-08	No	-
2	rs2042555	148555489	3.43e-12	No	Misery; Feel
2	rs7567451	157053380	4.75e-09	No	-
2	rs10497655	185462041	1.13e-08	No	Feel
3	rs6773869	16870340	5.24e-10	No	-
3	rs1542212	35683935	7.69e-11	No	Worry; Emb
3	rs836927	107201428	6.61e-09	No	-
3	rs3849471	117000128	3.91e-08	No	Misery
3	rs6791611	136160590	7.23e-13	No	Misery; Fed-up; Nervous; Worry; Emb
3	rs1682337	136710519	1.32e-08	No	-
4	rs10032297	139013401	2.21e-09	No	-
4	rs7696796	183166469	1.67e-09	No	Tense
5	rs7723944	93090256	8.02e-09	No	-
5	rs10455007	107742569	5.59e-11	No	Irr
6	rs10456089	11959836	3.26e-08	No	-
6	rs9462364	11997050	3.02e-09	No	Worry
6	rs7772160	27412386	8.13e-09	No	Guilt
6	rs172330	28786884	3.57e-08	No	Misery
6	rs28986304	29566082	3.64e-09	No	Misery
6	rs6986	30313340	9.19e-10	No	Misery; Guilt
6	rs28894993	31289714	1.97e-08	No	Mood
6	rs2269426	32076499	5.15e-14	No	Misery; Nervous; Worry
6	rs2856674	32659645	2.05e-08	No	Nervous
6	rs2503775	98521600	4.09e-09	Yes	Nervous; Nerves
6	rs240764	100953148	1.01e-10	No	-	Luciano et al. (2018)1
7	rs868754	2033780	2.11e-08	No	Misery; Irr
7	rs57506017	12245225	2.77e-10	No	Mood; Misery; Irr; Tense
7	rs2715147	82448405	4.07e-08	No	-
7	rs59970005	82941863	1.83e-08	No	Nervous; Nerves
7	rs274640	86257016	5.38e-09	No	-
7	rs1450833	113865735	3.66e-08	Yes	Irr; Tense
7	rs13239186	117510621	6.03e-11	No	Misery; Fed-up
7	rs13226841	126389408	4.55e-12	No	Feel; Emb
7	rs320697	137048213	3.07e-08	No	-
7	rs28413916	155086604	4.92e-08	No	-
8	rs2407746	4937757	1.58e-11	No	Nervous
8	rs17602876	8145931	2.38e-08	No	-
8	rs2921036	8363897	5.04e-25	No	Nerve; Emb; Tense; Worry; Nervous; Fed-up; Irr; Misery
8	rs56091524	8679866	8.27e-10	No	Worry
8	rs11781493	8891513	5.98e-11	No	Irr; Worry
8	rs11783641	9221207	9.36e-09	No	-
8	rs2661747	9793121	1.8e-09	No	Irr; Worry
8	rs118122582	9828897	5.06e-12	No	Worry
8	rs7813389	9834862	3.32e-10	No	Nervous
8	rs11777161	10043145	2.47e-09	No	Worry
8	rs4526367	10213462	6.14e-17	No	Misery; Irr; Feel; Nervous; Worry; Tense; Emb; Nerves
8	rs13278953	10580154	4.8e-10	No	Worry; Nervous
8	rs17711777	10623240	1.33e-08	No	-
8	rs17774023	10626333	1.12e-12	No	Nerve; Worry; Nervous
8	rs76556419	10840096	1.37e-08	No	-
8	rs7014291	10937008	1.16e-10	No	Worry
8	rs73198975	11043698	1.63e-08	No	-
8	rs7846252	11289053	1.78e-08	No	-
8	rs2686190	11655577	3.01e-09	No	-
8	rs6578124	141623932	3.67e-08	No	Mood
9	rs2380937	4145781	4.16e-10	No	Guilt
9	rs56116032	11453149	4.72e-11	No	Mood; Feel
9	rs10757411	23301612	3.64e-10	No	-
9	rs10119773	23736400	7.31e-10	No	Guilt
9	rs10966087	23816941	1.42e-08	No	-
9	rs7869969	96217447	1.74e-09	No	Lonely
9	rs12341488	96331171	6.32e-10	No	Feel; Tense
9	rs60150206	98262223	4.1e-12	No	Feel; Worry
9	rs2149351	120501644	4.7e-09	No	Mood
9	rs1360693	122667930	4.35e-08	No	Mood; Guilt
10	rs2093623	10922977	5.67e-09	No	-
10	rs11596214	106453832	1.62e-08	Yes	Mood; Misery; Fed-up
10	rs7912226	107652144	3.07e-08	No	Misery; Fed-up
10	rs703409	119298687	6.75e-09	No	-
11	rs4757144	13331226	2.34e-10	Yes	Emb; Guilt
11	rs297346	16355771	2.14e-08	No	Mood
11	rs2071754	31812582	9.36e-11	No	Irr; Nervous; Worry
11	rs1055447	47186424	3.36e-08	No	Misery; Fed-up
11	rs7107356	47676170	5.56e-13	Yes	Mood; Misery; Nerves; Lonely; Guilt
11	rs527528	57433327	1.05e-10	No	Feel; Worry; Emb
11	rs674437	88689953	1.01e-09	No	Emb
11	rs10789929	112830663	1.99e-09	No	-
11	rs11214589	113245048	1.53e-13	No	Guilt
11	rs1800497	113270828	1.05e-08	No	-
11	rs4309187	113412443	7.26e-18	No	Mood; Misery; Feel; Fed-up; Emb; Guilt
11	rs73004016	113444727	7.25e-10	No	-
11	rs73034263	133808038	4.74e-08	No	Worry
12	rs11066591	109880523	2.22e-10	No	-
12	rs3741475	117669914	1.36e-09	No	-	Luciano et al. (2018)1
13	rs61361413	66542715	2.62e-08	No	Mood; Irr; Fed-up
13	rs147861665	66996044	4.82e-08	No	-
13	rs7338774	69344134	5.5e-11	No	Mood
13	rs9541687	69569353	4.39e-09	No	Fed-up
14	rs1782170	41674903	7.25e-09	No	-
14	rs4902704	69703588	4.07e-08	No	Fed-up
14	rs4140799	72170969	3.63e-11	No	-	Luciano et al. (2018)1
14	rs112850127	72284548	1.49e-08	No	-	Luciano et al. (2018)1
14	rs1866628	75075505	8.12e-09	No	-			References
14	rs10144845	75237770	2.41e-13	No	Mood; Irr; Fed-up; Nervous; Worry; Nerves; Guilt			1	Luciano, M. et al. Association analysis in over 329,000 individuals identifies 116 independent variants influencing neuroticism. Nature Genetics 50, 6 (2018).
15	rs35761651	78003069	6.13e-13	No	Mood; Misery; Fed-up; Worry
15	rs8039690	78136541	1.25e-09	No	Worry
16	rs3785235	7667228	3.46e-11	No	Worry; Emb
16	rs1870293	30970941	6.39e-10	No	Irr; Worry
16	rs844396	88966667	4.11e-08	No	-
17	rs12938775	2574821	4.24e-12	No	Misery; Worry
17	rs62065453	43573419	3.71e-22	No	Nervous; Fed-up; Feel; Irr; Misery; Mood
17	rs62062288	44096553	4.67e-23	No	Mood; Misery; Irr; Feel; Fed-up; Nervous; Worry; Guilt
17	rs1378358	44787312	7.86e-20	No	Mood; Misery; Irr; Feel; Fed-up; Nervous
17	rs7502590	79082081	4.32e-10	No	-	Luciano et al. (2018)1
18	rs11665070	35152563	5.17e-18	No	Mood; Misery; Feel; Fed-up; Worry; Emb; Guilt
18	rs72899043	35361130	9.22e-09	No	Mood
18	rs4632195	50746748	9.7e-13	No	Mood; Misery; Fed-up; Tense
18	rs9953930	52757346	1.69e-08	No	Mood
18	rs56403421	52765283	5.56e-12	No	Mood; Irr
18	rs12969553	53101904	4.87e-11	No	Mood; Irr; Worry
22	rs11090045	41753603	2.43e-13	No	Mood; Irr; Worry; Tense
Note. 118 independent hits for neuroticism defined using a pruning window of 500 kb and r2 > 0.1. For chromosomes 6 and 8 an additional pruning filter was used of 1,000,000 kb and r2 > 0.1 to account for long-range LD due to the MHC region and pericentric inversion, respectively. The “Prev. Univariate GWAS” column indicates whether the hit was in LD with a hit for one of the univariate indicators…

## Sheet: TableS7
Supplementary Table 7. 69 independent hits for WLS estimation of QSNP for neuroticism
CHR	SNP	BP	QSNP p-value	Mood Beta	Mood p-value	Misery Beta	Misery p-value	Guilt Beta	Guilt p-value	Lonely Beta	Lonely p-value	Nerve Beta	Nerve p-value	Embarras Beta	Embarras p-value	Tense Beta	Tense p-value	Worry Beta	Worry p-value	Nervous Beta	Nervous p-value	Fed-up Beta	Fed-up p-value	Hurt Beta	Hurt p-value	Irritability Beta	Irritability. p-value
1	rs55666439	44111212	7.97e-09	-0.00324867	0.273729	-0.000804866	0.787253	-0.0105665	0.00121456	0.00268762	0.367014	-0.00370269	0.221966	0.0150747	1.39222e-05	0.0115186	8.58563e-05	0.000684697	0.859477	0.0117786	7.24313e-05	0.0103494	0.00371723	-0.00215824	0.576587	0.00422504	0.193523
1	rs1845464	49796025	1.28e-08	-0.00212709	0.455016	-0.00776847	0.00661754	-0.00908108	0.00374723	0.0032528	0.255059	-0.00397395	0.171795	0.0152749	4.43672e-06	0.00682216	0.0153143	0.00650176	0.0796787	0.00571176	0.0448616	0.00848565	0.013147	0.00341751	0.356672	-0.00451774	0.147239
1	rs7526108	98305394	5.46e-10	-0.00517206	0.116259	-0.00493993	0.135426	0.00820096	0.0236092	0.0040263	0.22318	-0.00917397	0.00638008	0.0194889	4.1168e-07	0.0110265	0.000701921	0.0158651	0.000217498	0.00496594	0.131564	0.00833341	0.0352346	-0.0120358	0.00500291	0.000998461	0.781808
1	rs227199	210265384	1.17e-08	0.0047648	0.110757	0.00614147	0.0407749	0.0104941	0.00141183	0.00560189	0.0617732	-0.00743655	0.0148155	0.00326433	0.349948	0.0085028	0.00397532	0.00386132	0.321262	0.0140433	2.59913e-06	0.000658391	0.854523	-0.00725828	0.062102	0.00917179	0.00504576
2	rs718139	23975911	7.05e-16	0.0146522	0.000250542	0.0239539	2.55229e-09	0.00849397	0.0537148	-0.00510168	0.204041	0.025185	7.17246e-10	-0.00497293	0.287712	0.00311154	0.431332	-0.00511377	0.326704	0.00531223	0.184362	0.000838621	0.861574	0.016164	0.00192204	0.0299786	7.70997e-12
2	rs10460551	24627074	3.77e-08	0.0131047	4.3564e-05	0.0156226	1.23466e-06	0.00414396	0.240109	-0.00155619	0.628688	0.0182289	2.59212e-08	0.000185533	0.960515	-0.00422914	0.181885	0.00148655	0.721948	0.000379861	0.90569	0.00783094	0.0421196	0.0138267	0.000926487	0.0119801	0.000641703
2	rs115319635	25441469	2.21e-08	0.00577683	0.211385	0.00179353	0.699372	0.00285845	0.574107	-0.00699065	0.131895	0.00193724	0.681576	-0.0233591	1.53626e-05	-0.0163716	0.000337807	-0.00501479	0.405057	0.0080252	0.0825535	-0.0156283	0.00490531	0.0132237	0.0280276	0.0086805	0.0862782
2	rs4953150	45157336	2.93e-09	0.00656229	0.0255537	0.00282135	0.339355	0.0204439	2.57153e-10	-0.000760706	0.796511	0.00888972	0.00306194	-0.0107622	0.0017312	1.32484e-06	0.999636	0.00293163	0.443935	0.000110609	0.96998	-0.00205774	0.560186	-0.00103279	0.787267	0.00247096	0.442496
2	rs10490220	50945777	3.48e-08	0.0145192	0.00168287	0.0219621	2.25725e-06	0.00995602	0.0502872	0.0130359	0.00496006	0.022248	2.44806e-06	-0.00528036	0.328434	-0.00264452	0.562601	-0.00231538	0.70066	0.00294388	0.524233	0.00920491	0.0975375	0.034753	7.73337e-09	0.0118023	0.0196861
2	rs1641155	58965211	3.64e-09	0.00136818	0.651684	-3.92751e-05	0.98971	-0.00425144	0.202364	-0.00994122	0.00108397	0.00912523	0.00320121	-0.0139966	7.7858e-05	-0.00721718	0.0159578	-0.00545337	0.167305	-0.0143844	2.07574e-06	-0.00473807	0.193354	0.00843545	0.0325723	-2.56308e-05	0.993837
2	rs12994592	100857984	7.73e-10	-0.00456976	0.10882	-0.00210185	0.462934	-0.00288349	0.357809	0.00288823	0.312661	-0.0118556	4.64226e-05	0.00536626	0.107203	0.00624472	0.0265846	0.000224016	0.951895	-0.00170598	0.549454	0.00919833	0.00724092	-0.00741442	0.0457277	0.0111395	0.000356312
2	rs4851649	104059441	9e-13	-0.00706611	0.0113191	-0.000480551	0.863892	-0.00183834	0.54929	0.00509142	0.0690608	-0.00289944	0.308948	0.0216089	3.43466e-11	0.00858445	0.00184662	0.00671979	0.0645333	0.00493551	0.0769131	0.00949561	0.00462823	-0.00109749	0.762599	-0.00785253	0.0101437
2	rs13021256	162796517	8.16e-10	0.00468501	0.103124	0.00813428	0.00485578	-0.00350718	0.267483	0.00589249	0.0411262	0.013567	3.8176e-06	-0.00670514	0.0459782	0.000151433	0.957481	-0.0102273	0.00631968	-0.00474831	0.0985764	-0.00677961	0.0497125	-0.00619246	0.0980577	0.000457798	0.884335
2	rs12477961	199495674	4.29e-09	-0.0159733	1.23162e-08	-0.0121848	1.53402e-05	-0.00696754	0.0239674	0.00190256	0.49919	-0.010413	0.00027823	0.000439577	0.893344	0.00320989	0.2468	0.00201076	0.582189	0.0056929	0.042402	-0.00154387	0.646968	-0.0105267	0.00395023	0.00237052	0.440121
3	rs35999162	49597230	8.22e-16	-0.0150763	3.13591e-07	-0.0164958	2.54529e-08	-0.00419225	0.196152	0.00502308	0.0895577	-0.0200403	2.7966e-11	0.00289227	0.401224	-0.00447806	0.124176	-0.00688186	0.0731559	0.00956255	0.00117847	-0.00415145	0.241253	-0.0152435	7.14163e-05	-0.0103493	0.00134021
3	rs353547	52268866	3.77e-10	0.00529161	0.0598915	-0.00171924	0.542911	-0.00847258	0.00618116	-4.67692e-05	0.986782	0.00299602	0.296959	0.0158653	1.39025e-06	0.0130531	2.63623e-06	0.0117704	0.00131745	0.00275556	0.327212	0.0128035	0.000151819	0.00140559	0.701126	0.00822101	0.00758138
3	rs11719137	52876389	6.96e-12	-0.00246308	0.383614	-0.00442784	0.119043	-0.0061637	0.0475372	0.00401431	0.157179	-0.00284032	0.3253	0.015897	1.5028e-06	0.0168357	1.66925e-09	0.0128111	0.000505183	0.00808686	0.00423147	0.00616501	0.0696094	-0.00659575	0.0731923	0.00412219	0.182896
3	rs34495106	85651136	3.73e-21	0.00258509	0.369267	0.00152065	0.59914	0.00945105	0.00285187	-0.00144654	0.616712	0.00286827	0.329409	0.027431	3.58353e-16	0.0226856	1.52847e-15	0.0179733	1.65799e-06	0.00935199	0.00116248	0.0230827	2.53708e-11	-0.00854768	0.0226205	0.00053692	0.864746
3	rs9876664	85806313	4.82e-08	-0.00426707	0.13165	-0.00341459	0.22987	-0.00732684	0.0186387	-0.00211004	0.457661	-0.0052596	0.0688605	0.0146525	9.46507e-06	0.0110887	7.34162e-05	-0.0012552	0.733589	0.00431577	0.127328	0.00642261	0.0590169	-0.00522101	0.156614	-0.000974562	0.753128
4	rs362307	3241845	9.58e-09	0.0116458	0.042236	0.00883006	0.125335	0.00297149	0.637634	-0.00101456	0.86007	0.0079801	0.172995	-0.0119265	0.075151	-0.0112872	0.0463412	0.014522	0.0519108	-0.0302839	1.27922e-07	-0.011708	0.089313	0.0141203	0.0585966	-0.00937596	0.13525
4	rs34811474	25408838	2.39e-08	-0.013115	0.000100337	-0.00549387	0.104881	-0.0039629	0.285449	0.00843514	0.0126915	-0.00817008	0.017678	0.0123977	0.00165718	0.00430432	0.19639	0.00119673	0.78532	0.00913595	0.00674068	-0.00152533	0.706621	-0.0110993	0.0114743	-0.00166191	0.652553
4	rs10027492	28647811	2.25e-12	-0.00857588	0.00229264	-0.0115903	4.09967e-05	-0.00166074	0.591491	0.00293419	0.298615	-0.0157461	4.20881e-08	0.00433015	0.187771	0.00589779	0.0338116	0.00498825	0.17343	0.00781136	0.00547986	0.00961354	0.00445175	-0.0107909	0.00321323	-0.00355816	0.247817
4	rs10007721	105333354	1.54e-08	0.00686034	0.0237336	0.00935044	0.0021578	0.00579278	0.0826713	-0.000288076	0.924631	0.00336243	0.277868	-0.00543492	0.125365	-0.00963969	0.00130102	0.000144318	0.970876	0.00881748	0.00365659	-0.00242898	0.505294	-0.00279136	0.47983	0.0110886	0.000841431
4	rs12647922	106063987	2.5e-08	-0.00325591	0.340814	-0.000925602	0.787538	0.00984459	0.00885545	-0.00374986	0.274421	0.0055515	0.111812	-0.0056469	0.157558	0.000393697	0.907206	0.0150916	0.000702338	0.0125979	0.000228246	0.0031122	0.448705	0.00461465	0.299855	0.00906946	0.0153637
4	rs2647234	106260991	1.51e-09	0.00365264	0.196515	-0.00266037	0.349164	-0.00925955	0.00292397	-0.00579912	0.0410713	0.00265374	0.358274	0.00155564	0.637948	-0.000360787	0.897277	-0.00746876	0.0426821	-0.013556	1.6419e-06	-0.00722367	0.0335685	-0.0118809	0.00125495	-0.00670526	0.0303361
4	rs13125131	130830801	1.19e-09	0.0152576	0.0617322	-0.0156011	0.0572764	0.0357684	6.87894e-05	-0.00486691	0.552726	0.0108055	0.19521	-0.0303032	0.00150184	-0.027881	0.00055047	-0.00745128	0.483798	-0.0214088	0.00876134	-0.015013	0.126144	0.0124709	0.240957	-0.0162325	0.0694456
5	rs747880	93982573	4.77e-10	-0.00169893	0.540933	-0.00458282	0.100713	-0.00504949	0.0986367	0.00808736	0.00373736	-0.00104823	0.711889	0.0179631	3.18938e-08	0.000596434	0.828039	0.0086284	0.0171665	0.00885481	0.00144032	0.0144171	1.58118e-05	0.00110658	0.759752	-0.00090052	0.767218
5	rs7727738	112021399	4.84e-10	-0.00798379	0.0040761	-0.00964191	0.000555911	-0.00702662	0.0215982	0.00479691	0.0855783	-0.00608996	0.0319585	0.00665694	0.0404849	0.00795191	0.00379069	-0.000927837	0.797819	0.00828534	0.00287798	0.00578999	0.0830801	-0.00642932	0.0757067	0.0108842	0.00034798
5	rs67988891	152204741	2.9e-14	-0.00489967	0.0993305	-0.00848413	0.00450741	-0.00733718	0.024897	-0.00256614	0.389831	-0.00480362	0.11367	0.00280168	0.420121	-0.00265813	0.365547	-0.0119139	0.00210011	0.0146774	7.93766e-07	0.000878483	0.80579	-0.0204912	1.20057e-07	-0.00308497	0.343205
5	rs17503738	152603307	7.95e-09	-0.00584986	0.0394769	-0.00103344	0.717321	0.00435531	0.16353	0.0107214	0.000170025	-0.000823991	0.776439	-0.00056525	0.864841	0.00334058	0.234043	0.00751887	0.0422308	-0.00214252	0.450779	-0.0086825	0.0109923	0.00836949	0.0236745	-0.00329997	0.288676
6	rs3095335	30741305	1.5e-09	-0.0016985	0.664062	-0.0124893	0.00148078	0.0042954	0.318183	-0.0081529	0.0378122	-0.0048246	0.227127	-0.0169353	0.000211607	-0.00670214	0.0828591	-0.0237007	3.29667e-06	0.00462884	0.236602	-0.016652	0.000395804	-0.00702027	0.168052	-0.0187912	1.13794e-05
6	rs2242660	31597753	7.13e-10	-0.00211087	0.462247	-0.00637569	0.0271105	-0.00645994	0.040886	-0.0101023	0.000456334	-0.00172447	0.556542	-0.021705	9.96345e-11	-0.0142431	5.16154e-07	-0.0166444	8.62392e-06	0.00356188	0.214824	-0.0112968	0.00106197	-0.00223098	0.550737	-0.00925813	0.00322712
6	rs9490512	98537993	1.12e-08	0.00595955	0.0331516	0.00455724	0.104967	-0.00432054	0.160452	-0.00324148	0.248379	0.00714292	0.0124301	0.00474073	0.147147	-0.000444658	0.872212	-0.0040161	0.270579	-0.00842886	0.00258931	0.00762404	0.0233615	0.00644357	0.0769434	-0.01126	0.000236445
6	rs1906252	98550289	1.66e-14	-0.0119454	1.71379e-05	-0.00859473	0.00208	0.000590458	0.846859	-0.00873992	0.00172627	-0.0140887	6.89234e-07	-0.0157401	1.25681e-06	-0.00249245	0.363988	0.00323946	0.370912	0.00150242	0.588732	-0.0175519	1.47034e-07	-0.00740498	0.0407034	0.00473915	0.119246
7	rs6465608	97356708	1.38e-09	-0.0048693	0.0801339	-0.00209334	0.454029	-0.00308686	0.313364	0.00378879	0.17495	-0.00500334	0.0783459	0.0189606	5.55097e-09	0.0135714	7.97541e-07	0.00446168	0.218486	0.00849805	0.00225959	0.00753885	0.0241824	-0.000156939	0.965454	0.00419552	0.168443
7	rs2396765	114304969	1.41e-09	0.00426233	0.131056	0.00541179	0.056386	0.016395	1.3008e-07	0.00341171	0.228567	0.00392093	0.17387	-8.63796e-05	0.979115	-0.000506747	0.855841	0.0206978	1.82516e-08	0.00723733	0.0103567	0.00764787	0.0241816	0.0145389	7.64371e-05	0.00406576	0.188304
8	rs1217106	64567670	5.91e-09	0.00229782	0.490658	0.0121021	0.000302653	-0.00716409	0.0508148	0.00352527	0.292124	0.00910328	0.00750829	0.011299	0.00373702	0.0129759	8.17741e-05	0.0124917	0.00402985	0.0045815	0.169383	0.00113306	0.777339	0.000488502	0.910407	0.0177285	1.18718e-06
8	rs13256013	89463432	4.95e-08	0.00431418	0.192845	0.0018691	0.574464	0.0200674	3.68604e-08	0.000582359	0.860986	0.0109492	0.00121351	0.0103461	0.00754794	-0.00277342	0.396893	0.012822	0.00297477	0.000946237	0.77519	-0.000573303	0.885516	0.0096674	0.0250369	-0.00198622	0.583954
8	rs4129585	143312933	2.35e-09	-0.0075648	0.00679913	-0.000351872	0.900292	0.00174885	0.5696	-0.0096999	0.000545457	-0.00625043	0.028571	-0.0193641	3.07909e-09	-0.0147063	1.00973e-07	-0.0211557	6.26526e-09	-0.00827818	0.00306098	-0.0126134	0.000173427	-0.0052073	0.152528	0.0004075	0.894059
9	rs7852243	126417340	5.77e-11	0.00289953	0.309174	-0.00117148	0.682597	-0.00314824	0.315616	0.00658896	0.0213196	0.00453998	0.119014	0.0154321	3.64597e-06	0.0142322	4.37631e-07	0.00152696	0.68106	-0.00264663	0.353309	0.0132769	0.000106792	0.000922191	0.803844	-0.00722228	0.0206787
10	rs28606370	104670832	4.55e-15	-0.00223604	0.436375	0.00389606	0.17711	0.0108612	0.000590428	-0.006564	0.0228321	-0.00151797	0.604948	-0.0196284	5.05134e-09	-0.0178848	2.9653e-10	-0.00240588	0.520413	-0.00664918	0.0206503	-0.0120095	0.000504697	-0.00157418	0.67392	0.00192596	0.540305
10	rs11599236	106454672	9.16e-11	-0.0172742	6.32737e-10	-0.0187995	2.1418e-11	0.00177801	0.563097	-0.00973779	0.000517287	-0.0162939	1.13722e-08	-0.00348259	0.286354	-0.00049814	0.856839	-0.010872	0.00282701	-0.00911353	0.00110974	-0.0147402	1.13866e-05	-0.00912936	0.0121145	-0.0106885	0.000476115
11	rs34862781	13305263	5.15e-12	-0.00531879	0.059445	-0.0111615	8.2602e-05	-0.0100232	0.00124553	-0.00406187	0.151563	-0.0103757	0.000318335	-0.0141316	1.83191e-05	-0.0102405	0.000240028	-0.0119165	0.00119076	-0.0259146	4.13695e-20	-0.00711164	0.036	-0.0132972	0.00029601	-0.0160411	2.07138e-07
11	rs11030107	27694835	2.44e-13	-0.000494673	0.880059	0.00702346	0.0329862	-0.00992923	0.00591119	-0.00354564	0.281264	0.00388141	0.246397	-0.021555	1.85128e-08	-0.0165116	3.44404e-07	-0.00895682	0.0360054	-0.0118238	0.000310325	-0.00904527	0.0216917	0.0110596	0.00957856	0.00561593	0.117639
11	rs12364432	47902883	3.78e-13	-0.0137067	2.21202e-06	-0.0168908	6.44102e-09	-0.00687259	0.0310296	-0.00293256	0.313082	-0.0092511	0.00176369	-0.0121831	0.000319532	-0.00702955	0.0140337	-0.00646259	0.0867878	-0.00819295	0.00467242	-0.0275274	2.57828e-15	-0.0245077	8.07458e-11	-0.0128877	4.80529e-05
11	rs893949	134296384	3.29e-08	0.00690813	0.0131214	0.0110516	7.83406e-05	0.00960264	0.00172674	-0.000790811	0.77727	0.0145203	3.31593e-07	-0.00539254	0.0976323	-0.00264959	0.335658	-0.00439499	0.225853	-0.00453062	0.103811	-0.00599332	0.0733722	0.00891713	0.0139427	0.000251616	0.934231
12	rs4298967	2408194	5.69e-10	-0.00351402	0.231478	-0.001724	0.559054	-0.0114619	0.000389486	-0.00409994	0.164282	0.00796336	0.00793655	-0.0123327	0.000327326	-0.013965	1.49053e-06	-0.0190037	6.81412e-07	-0.00448025	0.127144	-0.00306984	0.384448	0.00269242	0.481421	-0.000216734	0.946255
12	rs2160515	16753965	2.03e-13	-0.00834566	0.00280972	-0.00165784	0.554728	-0.0103873	0.000725677	-6.75856e-05	0.980769	-0.00702464	0.0138117	0.00586984	0.0722163	0.0109321	7.46977e-05	0.00536569	0.140413	0.015276	4.53166e-08	0.00732415	0.029134	-0.00490963	0.177099	0.00334321	0.274281
12	rs933738	49943122	4.63e-08	0.00513569	0.173116	-0.00258187	0.495496	0.00952676	0.0216408	0.00481808	0.202947	-0.0075558	0.0497422	-0.000800206	0.85591	0.0138321	0.000204703	0.00483206	0.325276	0.0165697	1.10776e-05	-5.87552e-05	0.989654	-0.00929388	0.0583441	0.0126612	0.00215706
12	rs651548	99560183	1.38e-08	0.00332509	0.238998	-0.00425514	0.133696	0.0116598	0.000174973	0.00391396	0.167338	-0.00160285	0.578415	0.0143906	1.30172e-05	0.00519656	0.0625579	0.0172681	2.68699e-06	0.00830921	0.00325764	0.00365979	0.280887	-0.00328196	0.372133	0.0119948	0.000104447
12	rs3764002	108618630	2.14e-10	-0.00446433	0.158934	-0.00488014	0.125387	0.00280617	0.420984	0.00245433	0.440402	-0.00502836	0.120337	0.0186137	5.03777e-07	0.0167678	8.57293e-08	0.0102569	0.0129952	0.0127415	5.81361e-05	0.0141975	0.000193386	-0.00721604	0.0803775	0.00230518	0.506437
13	rs4885657	55677154	4.93e-09	-0.00335836	0.231702	-0.00436616	0.121744	0.00813604	0.00845676	0.00800501	0.00451052	-0.00819688	0.00426453	0.013575	3.5355e-05	0.00436416	0.115758	0.00928835	0.0111281	0.010324	0.000236521	0.00297079	0.37872	-0.00664499	0.0691825	0.00435313	0.156767
13	rs4886057	58595240	6.49e-09	0.0192796	2.39728e-08	0.00756275	0.0293649	0.00822707	0.0304552	-0.00468789	0.176457	0.00987042	0.00515817	0.0055593	0.168654	0.00274888	0.420717	-0.00262129	0.560383	-0.0108282	0.00172496	0.00428801	0.301771	0.000902521	0.841014	7.65216e-05	0.983859
14	rs35091253	29579558	4.23e-09	0.0035167	0.317904	-0.00320446	0.365059	0.0172909	8.07451e-06	-0.011419	0.00123381	0.00358177	0.31929	0.00262825	0.5231	0.00470535	0.176247	0.0120694	0.0085189	-0.00588685	0.0945635	0.00013075	0.975352	0.00341465	0.456443	-0.0099182	0.0100817
14	rs12895055	99712794	2.84e-08	-0.00122046	0.662163	0.00418535	0.135896	-0.00861812	0.0050466	0.00666125	0.0175112	0.00585854	0.0400337	0.00383204	0.240543	0.00712686	0.00982033	-0.00897834	0.0136294	0.0068402	0.0143387	0.00709529	0.0345584	-0.00115951	0.749902	-0.00569216	0.0626881
16	rs62036613	28823097	2.43e-08	0.00504551	0.0879011	0.00828983	0.00526075	-0.00345563	0.288125	0.00287626	0.332451	0.0106227	0.00043532	0.0074018	0.0322117	0.00326518	0.263714	-0.00364161	0.344505	-0.00339298	0.251157	0.0190501	8.25188e-08	0.00884979	0.0215255	0.000973398	0.763619
16	rs8054556	29958216	2.85e-12	0.000619	0.824484	0.00605298	0.0308949	0.00277846	0.365612	-0.00226227	0.419382	0.00820913	0.00398181	-0.0185391	1.32405e-08	-0.00970769	0.000431572	-0.0140797	0.000108065	-0.00187099	0.502663	-0.00927534	0.00569046	0.00630005	0.0830278	0.00620354	0.0423314
16	rs61747555	71885423	1.81e-09	-0.0119225	0.00078133	-0.00603365	0.0906564	-0.0136087	0.00049248	3.44911e-05	0.992275	-0.0153288	2.3519e-05	-0.000370213	0.928894	0.0131618	0.000174717	-0.00776125	0.0932904	0.00516438	0.14567	0.00370081	0.385623	-0.00500414	0.278931	0.00420821	0.278791
16	rs1805007	89986117	1.94e-09	-0.00939699	0.0812035	-0.0166654	0.00208506	0.00710865	0.230594	0.0060991	0.259527	0.00543194	0.323727	0.00605748	0.336247	-0.000882963	0.868305	0.00475794	0.49803	0.0269548	5.6831e-07	0.0102956	0.111929	0.0111594	0.111793	-0.000282677	0.961786
17	rs507506	7118322	2.16e-08	-0.00336791	0.23201	-0.00574569	0.0424243	-0.00845138	0.00641496	0.00284327	0.314793	-0.0118736	3.70058e-05	0.00189297	0.565498	0.00513697	0.0650544	0.000383887	0.91673	-0.00708847	0.0118904	0.00399833	0.237768	0.00541344	0.140144	-0.00696588	0.0239435
17	rs11204421	19897805	4.25e-12	0.00746794	0.00788101	0.0026042	0.35644	0.0117703	0.000141145	0.00655267	0.0201963	0.00175671	0.540585	0.0147858	6.77041e-06	0.00921697	0.000903988	0.0163711	7.79867e-06	-0.0045269	0.107276	0.0144805	1.8114e-05	-0.00149214	0.683503	-0.0107201	0.000493814
18	rs613872	53210302	1.46e-14	0.0233402	1.43323e-10	0.017922	9.57425e-07	0.00968115	0.0156465	-0.00313189	0.391375	0.0233626	3.3027e-10	0.000639098	0.88061	0.00246387	0.493358	0.00383209	0.419134	-0.00923095	0.0112224	-0.00186221	0.670369	0.0264757	2.32698e-08	0.00142915	0.719884
18	rs663640	57846077	1.97e-11	0.00294845	0.377983	-0.00871154	0.00952858	-0.0103104	0.00508096	-0.00668474	0.046449	-0.00227606	0.505225	-0.0197837	4.17073e-07	-0.0217962	4.22312e-11	-0.0199235	4.82315e-06	-0.00591996	0.076726	-0.0243741	1.32344e-09	-0.00369642	0.39602	-0.00186804	0.609909
19	rs111492783	19357612	1.14e-08	-0.00281853	0.459212	-0.00732919	0.0554289	0.00675031	0.107179	0.00983421	0.0100892	-0.00611388	0.11599	0.0119887	0.00707472	0.000460845	0.902527	0.00776606	0.117549	-0.00333944	0.380558	0.00759369	0.0970842	-0.012553	0.0113607	-0.0176274	2.35406e-05
19	rs429358	45411941	3.22e-08	0.0099076	0.00983272	-0.00162191	0.674039	-0.00444935	0.29204	-0.00962947	0.0124288	-0.00018806	0.961736	0.0107776	0.0162826	0.00757139	0.0458718	0.00563516	0.25978	-0.0132181	0.000573063	0.00883072	0.0555516	0.00281856	0.572767	0.00337162	0.422275
20	rs56238684	33236696	4.96e-08	0.0121452	0.0838648	-0.000511765	0.942208	0.0384775	6.43859e-07	0.0119363	0.0905407	-0.000112455	0.987497	0.0455581	2.89269e-08	0.0185553	0.00752249	0.0323676	0.000406478	0.0288985	3.9043e-05	0.0119508	0.156984	-0.00109792	0.904481	0.00198237	0.796616
20	rs6067019	47828526	1.44e-08	0.00321755	0.255246	-0.0076236	0.00729971	-0.00323033	0.299238	-0.00170731	0.547563	-0.00153409	0.595375	0.000405312	0.902421	-0.00787995	0.00480593	-0.00605824	0.100171	0.00322165	0.254676	-0.00571879	0.092478	-0.0165806	6.71966e-06	0.00170385	0.582109
21	rs2837381	41417215	1.28e-08	0.00552845	0.0507839	0.00198754	0.484621	0.00280254	0.368176	-0.0118735	2.92237e-05	0.000737731	0.79858	-0.0146138	9.99184e-06	-0.00959757	0.000599711	-0.00755695	0.0404479	-0.0116372	3.93212e-05	-0.00144178	0.671684	0.0026863	0.466101	-0.00430544	0.164686
22	rs1974652	20134147	4.01e-08	-0.00209341	0.507854	-0.00928054	0.00348134	-0.0156525	6.79784e-06	-0.00603467	0.0572105	-0.00507918	0.115731	0.00759534	0.0398436	-0.00432895	0.165819	-0.00351505	0.39348	-0.0123947	8.83675e-05	0.00673185	0.0764371	-0.00720733	0.0799952	-0.0131752	0.000140732
Note. 69 independent hits for neuroticism defined using a pruning window of 500 kb and r2 > 0.1. For chromosomes 6 and 8 an additional pruning filter was used of 1,000,000 kb and r2 > 0.1 to account for long-range LD due to the MHC region and pericentric inversion, respectively. The betas reported are from the univariate GWASs of the individual items, and are standardized with respect to the vari…

## Sheet: TableS8
Supplementary Table 8. Peformance under controlled missingness
	Average chi-square		Significant loci		LD with item-level common factor hits	LD with QSNP of item-level Common Factor
Genomic SEM with Complete data
Genomic SEM Neuroticism Factor (~330 k items 1-12)	1.64		118		-	-
Genomic SEM (300 k parcels 1-3)	1.51		56		48	3
Univariate GWAS of Neuroticism Sum Score (~275 k)	1.60		91		72	0
Genomic SEM with Imposed Missingness
Genomic SEM (200 k parcels 1-2, 300 k parcel 3)	1.49		56		44	3
Univariate GWAS of Complete Data
Parcel 1 (300 k)	1.39		31		21	4
Parcel 2 (300 k)	1.43		46		25	6
Parcel 3 (300 k)	1.43		46		34	5
Univariate GWAS with Imposed Missingess
Parcel 2 (200 k, 100 k missing)	1.32		25		12	5
Parcel 1 (200 k, 100 k missing)	1.26		18		11	3
Note. All Genomic SEM models were estimated with WLS. Standard errors for univariate GWASs were corrected for univariate ld-score intercepts. The right two columns report the number of independent hits that were in LD with hits from the common neuroticism factor model estimated using WLS with the 12 item-level indicators. Common factor hits excluded those that were both hits for QSNP and the comm…

## Sheet: TableS9
Supplementary Table 9. Out-of-sample polygenic prediction for p-factor and five individual psychiatric disorder phenotypes in UK Biobank
Outcomes	p-factor			Depression			Psychotic Experiences
Predictors	Beta (SE)	R2 % (SE)		Beta (SE)	R2 % (SE)		Beta (SE)	R2 % (SE)
p-factor Genomic SEM WLS	0.055 (.006)	.318 (.042)		0.107 (.011)	.134 (.028)		0.083 (.010)	.514 (.109)
p-factor Genomic SEM ML	0.052 (.006)	.304 (.041)		0.108 (.011)	.138 (.028)		0.084 (.009)	.525 (.109)
Schizophrenia	0.047 (.006)	.238 (.031)		0.086 (.011)	.087 (.023)		0.074 (.009)	.411 (.098)
Bipolar disorder	0.020 (.004)	.045 (.016)		0.039 (.011)	.018 (.011)		0.051 (.009)	.200 (.066)
MDD	0.040 (.005)	.178 (.031)		0.101 (.011)	.120 (.026)		0.035 (.009)	.092 (.046)
Anxiety	0.029 (.005)	.090 (.022)		0.070 (.011)	.059 (.018)		0.009 (.009)	.006 (.011)
PTSD	0.015 (.004)	.026 (.012)		0.048 (.011)	.027 (.012)		0.018 (.009)	.026 (.024)
Outcomes	Anxiety			Mania			PTSD
Predictors	Beta (SE)	R2 % (SE)		Beta (SE)	R2 % (SE)		Beta (SE)	R2 % (SE)
p-factor Genomic SEM WLS	0.059 (.005)	.175 (.032)		0.044 (.005)	.266 (.055)		0.187 (.012)	.376 (.046)
p-factor Genomic SEM ML	0.058 (.005)	.167 (.031)		0.044 (.005)	.259 (.054)		0.176 (.012)	.332 (.043)
Schizophrenia	0.050 (.005)	.126 (.027)		0.039 (.005)	.205 (.048)		0.175 (.012)	.328 (.043)
Bipolar disorder	0.020 (.005)	.020 (.011)		0.020 (.005)	.057 (.025)		0.072 (.012)	.055 (.017)
MDD	0.048 (.005)	.118 (.026)		0.025 (.005)	.090 (.031)		0.106 (.012)	.118 (.026)
Anxiety	0.040 (.005)	.081 (.021)		0.019 (.004)	.051 (.023)		0.060 (.011)	.038 (.015)
PTSD	0.013 (.005)	.008 (.007)		0.014 (.004)	.029 (.018)		0.043 (.011)	.019 (.010)
Note. Betas and SEs are from standardized models. Covariates included in all models were age, sex, genotyping array, and 40 principal components of ancestry. All PGS predictors were entered into separate models. The R2 column reports the percentage of residual variance explained in the outcome left after controlling for covariates. Results indicated that the PGS for the Genomic SEM p-factor gener…

## Sheet: TableS10
Supplementary Table S10. Enriched gene sets identified by DEPICT for the p-factor
Original gene set ID	Original gene set description	p-value
ENSG00000141052	MYOCD subnetwork	1.807e-07
ENSG00000034053	APBA2 subnetwork	1.90631e-06
MP:0001405	impaired coordination	1.97489e-06
MP:0001469	abnormal contextual conditioning behavior	2.07276e-06
MP:0001454	abnormal cued conditioning behavior	2.38006e-06
MP:0002912	abnormal excitatory postsynaptic potential	2.45766e-06
MP:0003313	abnormal locomotor activation	4.35746e-06
GO:0030425	dendrite	4.63578e-06
GO:0044309	neuron spine	5.89546e-06
GO:0043197	dendritic spine	5.89546e-06
GO:0043198	dendritic shaft	7.39224e-06
GO:0097061	dendritic spine organization	7.75444e-06
GO:0060997	dendritic spine morphogenesis	7.75444e-06
MP:0001473	reduced long term potentiation	1.27269e-05
GO:0030424	axon	1.2801e-05
ENSG00000158445	KCNB1 subnetwork	1.31919e-05
GO:0019717	synaptosome	1.33933e-05
REACTOME_REDUCTION_OF_CYTOSOLIC_CA_LEVELS	REACTOME_REDUCTION_OF_CYTOSOLIC_CA_LEVELS	1.81177e-05
GO:0021954	central nervous system neuron development	1.98256e-05
GO:0043025	neuronal cell body	2.85729e-05
GO:0042596	fear response	3.19432e-05
MP:0002206	abnormal CNS synaptic transmission	3.51083e-05
GO:0033267	axon part	3.64112e-05
GO:0044327	dendritic spine head	3.69521e-05
GO:0014069	postsynaptic density	3.69521e-05
GO:0060996	dendritic spine development	3.92925e-05
ENSG00000132535	DLG4 subnetwork	4.0007e-05
GO:0032279	asymmetric synapse	4.49513e-05
MP:0001463	abnormal spatial learning	4.58051e-05
GO:0030427	site of polarized growth	4.64477e-05
MP:0002910	abnormal excitatory postsynaptic currents	5.05117e-05
GO:0030426	growth cone	5.08663e-05
GO:0044297	cell body	5.71689e-05
MP:0002757	decreased vertical activity	7.20496e-05
MP:0003460	decreased fear-related response	7.93698e-05
ENSG00000051128	HOMER3 subnetwork	8.16911e-05
REACTOME_AXON_GUIDANCE	REACTOME_AXON_GUIDANCE	8.43166e-05
GO:0001662	behavioral fear response	9.00837e-05
GO:0002209	behavioral defense response	9.08009e-05
GO:0007409	axonogenesis	9.5369e-05
MP:0001973	increased thermal nociceptive threshold	0.000123001
GO:0044304	main axon	0.000125666
REACTOME_PLATELET_HOMEOSTASIS	REACTOME_PLATELET_HOMEOSTASIS	0.000128023
GO:0061001	regulation of dendritic spine morphogenesis	0.000132758
GO:0014047	glutamate secretion	0.000133064
GO:0007613	memory	0.00013741
GO:0048169	regulation of long-term neuronal synaptic plasticity	0.000139961
GO:0016358	dendrite development	0.00016017
ENSG00000044446	PHKA2 subnetwork	0.000172108
GO:0044306	neuron projection terminus	0.00017296
GO:0050890	cognition	0.000173201
MP:0001475	reduced long term depression	0.000174831
MP:0001399	hyperactivity	0.000175029
GO:0007611	learning or memory	0.00017611
GO:0019935	cyclic-nucleotide-mediated signaling	0.000183158
MP:0002906	increased susceptibility to pharmacologically induced seizures	0.000183378
MP:0000889	abnormal cerebellar molecular layer	0.000188407
GO:0043679	axon terminus	0.000197432
REACTOME_VOLTAGE_GATED_POTASSIUM_CHANNELS	REACTOME_VOLTAGE_GATED_POTASSIUM_CHANNELS	0.000204245
GO:0007270	neuron-neuron synaptic transmission	0.000221753
MP:0009754	enhanced behavioral response to cocaine	0.000228741
GO:0007612	learning	0.000230354
GO:0008038	neuron recognition	0.000234754
GO:0060079	regulation of excitatory postsynaptic membrane potential	0.00023513
REACTOME_NEURONAL_SYSTEM	REACTOME_NEURONAL_SYSTEM	0.000245604
GO:0022803	passive transmembrane transporter activity	0.000253517
GO:0015267	channel activity	0.000253517
GO:0048813	dendrite morphogenesis	0.000304562
MP:0002919	enhanced paired-pulse facilitation	0.000311114
ENSG00000170579	DLGAP1 subnetwork	0.000332051
GO:0007411	axon guidance	0.000338065
Note. Results only depicted for gene sets that passed the false discovery rate of < .05. Lead SNPs were entered for WLS estimation of the p-factor

[truncated: 11 more sheets: TableS11, TableS12, TableS13, TableS14, TableS15, TableS16, TableS17, TableS18, TableS19, TableS20, TableS21]
